# Supplementary material
Source: publisher site journal article supplement (https://www.dovepress.com/article/238002)
Supplement: Supplementary file 1 [file get_supplementary_file.php]

**Table S1** List of yeasts isolates from different clinical samples with their GenBank accession no., strain no., source of isolates and details of closest similarity included in the phylogenetic analysis.

| **S. No.** | **Strain Id** | **Identified** | **Acc. No.** | **Source of Isolate** | **Closest Similarity** | **Percent Similarity** |
| --- | --- | --- | --- | --- | --- | --- |
| 1 | 1_10 | *Candida albicans* | MK026215 | Urine | *Candida albicans* CBS 8781 | 99 |
| 2 | 1_11 | *Candida tropicalis* | MK026227 | Urine | *Candida tropicalis* ATCC 750 | 100 |
| 3 | 1_13 | *Candida glabrata* | MK026347 | Urine | *Candida glabrata* CBS 138 | 99 |
| 4 | 1_14 | *Candida parapsilosis* | MK026228 | Urine | *Candida parapsilosis* CBS 11059 | 100 |
| 5 | 1_17 | *Clavispora lusitaniae* | MK026240 | Urine | *Clavispora lusitaniae* CBS 5030 | 99 |
| 6 | 1_18 | *Candida parapsilosis* | MK026244 | Urine | *Candida parapsilosis* CBS 11059 | 100 |
| 7 | 1_19 | *Clavispora lusitaniae* | MK026212 | Sputum | *Clavispora lusitaniae* CBS 5030 | 100 |
| 8 | 1_22 | *Candida tropicalis* | MK026246 | Urine | *Candida tropicalis* ATCC 750 | 100 |
| 9 | 1_27 | *Cyberlindnera fabianii* | MK026280 | Blood | *Cyberlindnera fabianii* NRRL 1871 | 100 |
| 10 | 1_30 | *Candida albicans* | MK026362 | Urine | *Candida albicans* CBS 8781 | 99 |
| 11 | 1_34 | *Clavispora lusitaniae* | MK026218 | Sputum | *Clavispora lusitaniae* CBS 4413 | 100 |
| 12 | 10_1 | *Candida parapsilosis* | MK026210 | Sputum | *Candida parapsilosis* CBS 7156 | 100 |
| 13 | 10_10 | *Candida glabrata* | MK026342 | Sputum | *Candida glabrata* CBS 138 | 99 |
| 14 | 10_11 | *Candida albicans* | MK026363 | Urine | *Candida albicans* CBS 8781 | 99 |
| 15 | 10_12 | *Candida albicans* | MK026364 | BAL | *Candida albicans* CBS 8781 | 99 |
| 16 | 10_13 | *Candida albicans* | MK026221 | UTI | *Candida albicans* CBS 8781 | 99 |
| 17 | 10_14 | *Trichosporon asahii* | MK026306 | Blood | *Trichosporon asahii* CBS 2479 | 100 |
| 18 | 10_15 | *Candida glabrata* | MK026365 | Blood | *Candida glabrata* CBS 138 | 99 |
| 19 | 10_16 | *Candida tropicalis* | MK026283 | HVS | *Candida tropicalis* ATCC 750 | 100 |
| 20 | 10_17 | *Candida albicans* | MK026366 | HVS | *Candida albicans* CBS 8781 | 99 |
| 21 | 10_18 | *Candida tropicalis* | MK026260 | HVS | *Candida tropicalis* ATCC 750 | 100 |
| 22 | 10_19 | *Candida tropicalis* | MK026356 | HVS | *Candida tropicalis* NN 4 | 99 |
| 23 | 10_2 | *Candida glabrata* | MK026313 | Urine | *Candida glabrata* CBS 138 | 99 |
| 24 | 10_22 | *Candida glabrata* | MK026336 | HVS | *Candida glabrata* CBS 138 | 99 |
| 25 | 10_23 | *Candida tropicalis* | MK026275 | HVS | *Candida tropicalis* ATCC 750 | 100 |
| 26 | 10_25 | *Candida tropicalis* | MK026276 | HVS | *Candida tropicalis* ATCC 750 | 100 |
| 27 | 10_26 | *Candida tropicalis* | MK026350 | HVS | *Candida tropicalis* NN 4 | **98** |
| 28 | 10_28 | *Candida albicans* | MK026367 | HVS | *Candida albicans* CBS 8781 | 99 |
| 29 | 10_3 | *Candida glabrata* | MK026224 | Pericardial Fluid | *Candida glabrata* CBS 138 | 99 |
| 30 | 10_30 | *Candida glabrata* | MK026225 | HVS | *Candida glabrata* CBS 138 | 99 |
| 31 | 10_31 | *Candida albicans* | MK026368 | HVS | *Candida albicans* CBS 8781 | 99 |
| 32 | 10_4 | *Candida albicans* | MK026369 | PUS | *Candida albicans* CBS 8781 | 99 |
| 33 | 10_5 | *Candida tropicalis* | MK026314 | Urine | *Candida tropicalis* ATCC 750 | 100 |
| 34 | 10_6 | *Candida tropicalis* | MK026220 | Sputum | *Candida tropicalis* ATCC 750 | 99 |
| 35 | 10_7 | *Candida glabrata* | MK026344 | HVS | *Candida glabrata* CBS 138 | 99 |
| 36 | 10_8 | *Candida albicans* | MK026370 | PUS | *Candida albicans* CBS 8781 | 99 |
| 37 | 10_9 | *Candida albicans* | MK026371 | Cornea | *Candida albicans* CBS 8781 | 99 |
| 38 | 11_1 | *Candida albicans* | MK026372 | Urine | *Candida albicans* CBS 8781 | 99 |
| 39 | 11_16 | *Candida tropicalis* | MK026353 | Urine | *Candida tropicalis* NN 4 | 99 |
| 40 | 11_17 | *Candida tropicalis* | MK026355 | PUS | *Candida tropicalis* NN 4 | 99 |
| 41 | 11_18 | *Candida tropicalis* | MK026270 | Urine | *Candida tropicalis* ATCC 750 | 100 |
| 42 | 11_19 | *Candida albicans* | MK026310 | Sputum | *Candida albicans* CBS 1912 | 99 |
| 43 | 11_2 | *Candida parapsilosis* | MK026298 | Blood | *Candida parapsilosis* CBS 7156 | 99 |
| 44 | 11_3 | *Candida glabrata* | MK026245 | Urine | *Candida glabrata* CBS 138 | 99 |
| 45 | 11_6 | *Candida tropicalis* | MK026287 | Urine | *Candida tropicalis* ATCC 750 | 100 |
| 46 | 11_7 | *Candida albicans* | MK026293 | Urine | *Candida albicans* CBS 8781 | 99 |
| 47 | 11_8 | *Candida parapsilosis* | MK026241 | Blood | *Candida parapsilosis* CBS 11059 | 100 |
| 48 | 11_9 | *Candida tropicalis* | MK026257 | Blood | *Candida tropicalis* ATCC 750 | 100 |
| 49 | 12_1 | *Candida glabrata* | MK026315 | Urine | *Candida glabrata* CBS 138 | 99 |
| 50 | 12_3 | *Candida parapsilosis* | MK026351 | Sputum | *Candida parapsilosis* CBS 7156 | 100 |
| 51 | 12_4 | *Candida tropicalis* | MK026358 | Urine | *Candida tropicalis* NN 4 | 99 |
| 52 | 12_6 | *Candida albicans* | MK026294 | Sputum | *Candida albicans* CBS 1912 | 99 |
| 53 | 12_7 | *Candida tropicalis* | MK026271 | Sputum | *Candida tropicalis* ATCC 750 | 100 |
| 54 | 12_8 | *Candida tropicalis* | MK026256 | Urine | *Candida tropicalis* ATCC 750 | 100 |
| 55 | 13_11 | *Candida glabrata* | MK026332 | Urine | *Candida glabrata* CBS 138 | 99 |
| 56 | 13_14 | *Candida albicans* | MK026288 | Transbronchial Biopsy | *Candida albicans* CBS 1912 | 99 |
| 57 | 13_15 | *Candida albicans* | MK026239 | Transbronchial Biopsy | *Candida albicans* CBS 8781 | 99 |
| 58 | 13_17 | *Candida albicans* | MK026316 | EQUAS | *Candida albicans* CBS 1912 | 99 |
| 59 | 13_18 | *Candida albicans* | MK026373 | BAL | *Candida albicans* CBS 8781 | 99 |
| 60 | 13_19 | *Candida tropicalis* | MK026317 | Sputum | *Candida tropicalis* ATCC 750 | 100 |
| 61 | 13_2 | *Candida parapsilosis* | MK026261 | Urine | *Candida parapsilosis* CBS 11059 | 100 |
| 62 | 13_22 | *Candida albicans* | MK026324 | Urine | *Candida albicans* CBS 1912 | 99 |
| 63 | 13_23 | *Candida tropicalis* | MK026284 | Sputum | *Candida tropicalis* ATCC 750 | 100 |
| 64 | 13_24 | *Candida tropicalis* | MK026359 | Urine | *Candida tropicalis* ATCC 750 | 100 |
| 65 | 13_26 | *Candida parapsilosis* | MK026265 | Urine | *Candida parapsilosis* CBS 11059 | 100 |
| 66 | 13_27 | *Candida tropicalis* | MK026277 | Urine | *Candida tropicalis* ATCC 750 | 100 |
| 67 | 13_28 | *Candida albicans* | MK026374 | Sputum | *Candida albicans* CBS 8781 | 99 |
| 68 | 13_29 | *Candida tropicalis* | MK026299 | Blood | *Candida tropicalis* ATCC 750 | 100 |
| 69 | 13_30 | *Candida parapsilosis* | MK026285 | HVS | *Candida parapsilosis* CBS 7156 | 100 |
| 70 | 13_32 | *Candida albicans* | MK026330 | Sputum | *Candida albicans* CBS 1912 | 99 |
| 71 | 13_34 | *Candida tropicalis* | MK026318 | Urine | *Candida tropicalis* ATCC 750 | 100 |
| 72 | 13_36 | *Lodderomyces* sp. | MK026348 | Sputum | *Lodderomyces elongisporus* NRRL YB-4239 | **97** |
| 73 | 13_37 | *Candida parapsilosis* | MK026272 | Blood | *Candida parapsilosis* CBS 11059 | 100 |
| 74 | 13_39 | *Candida albicans* | MK026375 | Urine | *Candida albicans* CBS 8781 | 99 |
| 75 | 13_4 | *Candida tropicalis* | MK026266 | Urine | *Candida tropicalis* ATCC 750 | 100 |
| 76 | 13_8 | *Candida tropicalis* | MK026278 | Urine | *Candida tropicalis* ATCC 750 | 100 |
| 77 | 2_11 | *Candida parapsilosis* | MK026249 | Urine | *Candida parapsilosis* CBS 11059 | 100 |
| 78 | 2_13 | *Candida albicans* | MK026308 | Urine | *Candida albicans* CBS 1912 | 100 |
| 79 | 2_14 | *Candida albicans* | MK026376 | Urine | *Candida albicans* CBS 8781 | 99 |
| 80 | 2_16 | *Candida tropicalis* | MK026377 | Urine | *Candida tropicalis* ATCC 750 | 99 |
| 81 | 2_19 | *Candida glabrata* | MK026281 | Urine | *Candida glabrata* CBS 138 | 100 |
| 82 | 2_20 | *Candida tropicalis* | MK026235 | Urine | *Candida tropicalis* ATCC 750 | 100 |
| 83 | 2_21 | *Candida albicans* | MK026378 | Urine | *Candida albicans* CBS 8781 | 99 |
| 84 | 2_23 | *Candida albicans* | MK026379 | Urine | *Candida albicans* CBS 8781 | 99 |
| 85 | 2_24 | *Candida tropicalis* | MK026258 | Urine | *Candida tropicalis* ATCC 750 | 100 |
| 86 | 2_25 | *Candida tropicalis* | MK026273 | Sputum | *Candida tropicalis* ATCC 750 | 100 |
| 87 | 2_27 | *Candida albicans* | MK026325 | Sputum | *Candida albicans* CBS 1912 | 100 |
| 88 | 2_31 | *Candida glabrata* | MK026337 | Urine | *Candida glabrata* CBS 138 | 100 |
| 89 | 2_4 | *Candida tropicalis* | MK026223 | Urine | *Candida tropicalis* ATCC 750 | 100 |
| 90 | 2_5 | *Candida tropicalis* | MK026253 | Urine | *Candida tropicalis* ATCC 750 | 100 |
| 91 | 3_10 | *Candida albicans* | MK026380 | Urine | *Candida albicans* CBS 8781 | 99 |
| 92 | 3_11 | *Candida albicans* | MK026326 | Urine | *Candida albicans* CBS 1912 | 100 |
| 93 | 3_12 | *Candida albicans* | MK026320 | Urine | *Candida albicans* CBS 1912 | 100 |
| 94 | 3_13 | *Candida albicans* | MK026381 | Urine | *Candida albicans* CBS 8781 | 99 |
| 95 | 3_16 | *Candida glabrata* | MK026321 | Blood | *Candida glabrata* CBS 138 | 100 |
| 96 | 3_17 | *Candida albicans* | MK026327 | Sputum | *Candida albicans* CBS 1912 | 100 |
| 97 | 3_19 | *Candida albicans* | MK026382 | Sputum | *Candida albicans* CBS 8781 | 99 |
| 98 | 3_2 | *Candida albicans* | MK026383 | Urine | *Candida albicans* CBS 8781 | 99 |
| 99 | 3_20 | *Candida albicans* | MK026384 | Sputum | *Candida albicans* CBS 8781 | 99 |
| 100 | 3_21 | *Candida albicans* | MK026217 | HVS | *Candida albicans* CBS 8781 | 99 |
| 101 | 3_22 | *Candida albicans* | MK026385 | Urine | *Candida albicans* CBS 8781 | 99 |
| 102 | 3_24 | *Candida albicans* | MK026331 | Urine | *Candida albicans* CBS 1912 | 100 |
| 103 | 3_25 | *Clavispora lusitaniae* | MK026203 | Sputum | *Clavispora lusitaniae* CBS 4413 | 100 |
| 104 | 3_26 | *Candida glabrata* | MK026300 | CSF | *Candida glabrata* CBS138 | 100 |
| 105 | 3_3 | *Candida albicans* | MK026386 | Sputum | *Candida albicans* CBS 8781 | 99 |
| 106 | 3_4 | *Candida albicans* | MK026213 | Urine | *Candida albicans* CBS 8781 | 99 |
| 107 | 3_5 | *Candida albicans* | MK026387 | HVS | *Candida albicans* CBS 8781 | 99 |
| 108 | 3_6 | *Kluyveromyces marxianus* | MK026360 | Urine | *Kluyveromyces marxianus* CBS 712 | 99 |
| 109 | 3_7 | *Kluyveromyces marxianus* | MK026209 | Urine | *Kluyveromyces lactis* CBS 683 | 100 |
| 110 | 3_8 | *Candida albicans* | MK026301 | HVS | *Candida albicans* CBS 1912 | 100 |
| 111 | 4_12 | *Candida albicans* | MK026388 | Urine | *Candida albicans* CBS 8781 | 99 |
| 112 | 4_13 | *Candida albicans* | MK026263 | ETT | *Candida albicans* CBS 8781 | 99 |
| 113 | 4_17 | *Candida albicans* | MK026352 | Sputum | *Candida albicans* CBS 1912 | 99 |
| 114 | 4_2 | *Candida africana* | MK026279 | Urine | *Candida africana* | 99 |
| 115 | 4_21 | *Candida albicans* | MK026390 | Sputum | *Candida albicans* CBS 8781 | 99 |
| 116 | 4_22 | *Candida tropicalis* | MK026302 | ETT | *Candida tropicalis* ATCC 750 | 100 |
| 117 | 4_24 | *Candida glabrata* | MK026307 | Urine | *Candida glabrata* CBS 138 | 99 |
| 118 | 4_8 | *Kluyveromyces marxianus* | MK026333 | Sputum | *Kluyveromyces lactis* CBS 683 | 99 |
| 119 | 5_1 | *Candida tropicalis* | MK026231 | Urine | *Candida tropicalis* ATCC 750 | 99 |
| 120 | 5_10 | *Candida glabrata* | MK026345 | Sputum | *Candida glabrata* CBS 138 | 99 |
| 121 | 5_13 | *Candida tropicalis* | MK026274 | Urine | *Candida tropicalis* ATCC 750 | 100 |
| 122 | 5_16 | *Candida glabrata* | MK026311 | Sputum | *Candida glabrata* CBS 138 | 99 |
| 123 | 5_17 | *Candida tropicalis* | MK026230 | Urine | *Candida tropicalis* ATCC 750 | 100 |
| 124 | 5_18 | *Kodamaea ohmeri* | MK026219 | Blood | *Kodamaea ohmeri* | 100 |
| 125 | 5_2 | *Candida tropicalis* | MK026322 | RT (Blood) | *Candida tropicalis* ATCC 750 | 100 |
| 126 | 5_20 | *Candida albicans* | MK026226 | Urine | *Candida albicans* CBS 1912 | 100 |
| 127 | 5_6 | *I. orientalis* (=*C. krusei*= *Pichia kudriavzevii*) | MK026349 | Urine | *I. orientalis* (=*C. krusei*=*Pichia kudriavzevii*)CBS 5147 | 100 |
| 128 | 6_1 | *Candida tropicalis* | MK026282 | Urine | *Candida tropicalis* ATCC 750 | 100 |
| 129 | 6_11 | *Candida tropicalis* | MK026346 | Urine | *Candida tropicalis* ATCC 750 | 100 |
| 130 | 6_12 | *Candida albicans* | MK026391 | HVS | *Candida albicans* CBS 8781 | 99 |
| 131 | 6_13 | *Candida glabrata* | MK026233 | HVS | *Candida glabrata* CBS 138 | 99 |
| 132 | 6_14 | *Candida albicans* | MK026254 | HVS | *Candida albicans* CBS 8781 | 99 |
| 133 | 6_16 | *Candida albicans* | MK026392 | HVS | *Candida albicans* CBS 8781 | 99 |
| 134 | 6_18 | *Candida albicans* | MK026323 | HVS | *Candida albicans* CBS 1912 | 100 |
| 135 | 6_2 | *Candida albicans* | MK026295 | Urine | *Candida albicans* CBS 1912 | 100 |
| 136 | 6_3 | *Candida glabrata* | MK026343 | Urine | *Candida glabrata* CBS 138 | 99 |
| 137 | 6_5 | *Candida albicans* | MK026393 | ETT | *Candida albicans* CBS 8781 | 99 |
| 138 | 7_1 | *Candida albicans* | MK026394 | Sputum | *Candida albicans* CBS 8781 | 99 |
| 139 | 7_10 | *Candida albicans* | MK026395 | HVS | *Candida albicans* CBS 8781 | 99 |
| 140 | 7_3 | *Candida glabrata* | MK026304 | Blood | *Candida glabrata* CBS 138 | 99 |
| 141 | 7_4 | *Candida albicans* | MK026286 | Urine | *Candida albicans* CBS 1912 | 99 |
| 142 | 7_5 | *Candida tropicalis* | MK026396 | Sputum | *Candida tropicalis* ATCC 750 | 99 |
| 143 | 7_6 | *Candida albicans* | MK026357 | HVS | *Candida albicans* CBS 1912 | 99 |
| 144 | 7_9 | *Candida tropicalis* | MK026207 | HVS | *Candida tropicalis* ATCC 750 | 100 |
| 145 | 8_1 | *Candida albicans* | MK026206 | PUS | *Candida albicans* CBS 8781 | 99 |
| 146 | 8_10 | *Candida tropicalis* | MK026309 | ETT | *Candida tropicalis* ATCC 750 | 100 |
| 147 | 8_12 | *Candida albicans* | MK026204 | Sputum | *Candida albicans* CBS 8781 | 99 |
| 148 | 8_14 | *Candida albicans* | MK026290 | Urine | *Candida albicans* CBS 1912 | 100 |
| 149 | 8_15 | *Candida parapsilosis* | MK026341 | Blood | *Candida parapsilosis* CBS 7156 | 99 |
| 150 | 8_16 | *Candida tropicalis* | MK026255 | Urine | *Candida tropicalis* ATCC 750 | 100 |
| 151 | 8_17 | *Candida albicans* | MK026251 | Urine | *Candida albicans* CBS 1912 | 99 |
| 152 | 8_18 | *Candida albicans* | MK026205 | Sputum | *Candida albicans* CBS 8781 | 99 |
| 153 | 8_20 | *Candida parapsilosis* | MK026259 | Peritoneal Fluid | *Candida parapsilosis* CBS 11059 | 100 |
| 154 | 8_23 | *Candida parapsilosis* | MK026296 | Urine | *Candida parapsilosis* CBS 7156 | 100 |
| 155 | 8_3 | *Candida albicans* | MK026334 | HVS | *Candida albicans* CBS 1912 | 100 |
| 156 | 8_4 | *Candida albicans* | MK026305 | Urine | *Candida albicans* CBS 1912 | 100 |
| 157 | 8_7 | *Candida albicans* | MK026397 | Urine | *Candida albicans* CBS 8781 | 99 |
| 158 | 8_8 | *Candida tropicalis* | MK026268 | PUS | *Candida tropicalis* ATCC 750 | 99 |
| 159 | 8_9 | *Candida tropicalis* | MK026335 | Sputum | *Candida tropicalis* ATCC 750 | 100 |
| 160 | 9_10 | *Candida tropicalis* | MK026252 | Urine | *Candida tropicalis* ATCC 750 | 100 |
| 161 | 9_12 | *Candida glabrata* | MK026237 | Peritoneal Fluid | *Candida glabrata* CBS 138 | 99 |
| 162 | 9_13 | *Candida glabrata* | MK026236 | EQUAS | *Candida glabrata* CBS 138 | 99 |
| 163 | 9_2 | *Candida albicans* | MK026291 | ETT | *Candida albicans* CBS 1912 | 100 |
| 164 | 9_3 | *Candida tropicalis* | MK026243 | Stool | *Candida tropicalis* ATCC 750 | 100 |
| 165 | 9_4 | *Candida albicans* | MK026398 | Blood | *Candida albicans* CBS 8781 | 99 |
| 166 | 9_5 | *I. orientalis* (=*C. krusei*= *Pichia kudriavzevii*) | MK026312 | ETT | *I. orientalis* (=*C. krusei*=*Pichia kudriavzevii*)CBS 5147 | 99 |
| 167 | 9_6 | *Candida albicans* | MK026216 | Right Chick Mucosa | *Candida albicans* CBS 8781 | 99 |
| 168 | 9_8 | *Candida tropicalis* | MK026211 | Blood | *Candida tropicalis* ATCC 750 | 100 |
| 169 | 9_9 | *Candida glabrata* | MK026292 | Urine | *Candida glabrata* CBS 138 | 99 |
| 170 | 1_12 | *Cyberlindnera fabianii* | - | Blood | *Cyberlindnera fabianii* CBS 5640 | 99 |
| 171 | 8_13 | *Candida albicans* | - | Sputum | *Candida albicans* ATCC 18804 | 100 |
| 172 | 1_28 | *Candida albicans* | - | Urine | *Candida albicans* ATCC 18804 | 99 |
| 173 | 2_8 | *Candida tropicalis* | - | Urine | *Candida tropicalis* ATCC 750 | 100 |
| 174 | 4_5 | *Candida albicans* | - | Sputum | *Candida albicans* ATCC 18804 | 99 |
| 175 | 5_19 | *Candida albicans* | - | Urine | *Candida albicans* ATCC 18804 | 99 |
| 176 | 5_7 | *Candida albicans* | - | Urine | *Candida albicans* ATCC 18804 | 99 |

**Table S2** List of yeasts isolates from different clinical samples and their response to antifungal agents *viz*., Clotrimazole (CC10), Fluconazole (FLC25), Itraconazole (IT10), Ketoconazole (KT10), Nystatin (NS100).

| **S. No.** | **Sample ID** | **Identity** | **Antifungal Agent** | | | | |
| --- | --- | --- | --- | --- | --- | --- | --- |
| **CC10** | **FLC25** | **IT10** | **KT10** | **NS100** |
|  | 1_10 | *Candida albicans* | S | I | R | S | S |
|  | 1_11 | *Candida tropicalis* | R | R | R | R | S |
|  | 1_13 | *Candida glabrata* | S | S | I | S | S |
|  | 1_14 | *Candida parapsilosis* | S | R | I | S | S |
|  | 1_18 | *Candida parapsilosis* | S | S | S | S | S |
|  | 1_19 | *Clavispora lusitaniae* | R | R | R | I | S |
|  | 1_22 | *Candida tropicalis* | R | R | R | R | S |
|  | 1_27 | *Cyberlindnera fabianii* | R | S | R | S | S |
|  | 1_28 | *Candida albicans* | S | S | S | S | S |
|  | 1_30 | *Candida albicans* | S | S | R | S | S |
|  | 1_34 | *Clavispora lusitaniae* | S | S | I | S | S |
|  | 2_5 | *Candida tropicalis* | R | R | R | R | S |
|  | 2_11 | *Candida parapsilosis* | S | R | R | S | S |
|  | 2_13 | *Candida albicans* | S | S | R | S | S |
|  | 2_14 | *Candida albicans* | S | S | I | S | S |
|  | 2_19 | *Candida glabrata* | R | R | R | - | I |
|  | 2_20 | *Candida tropicalis* | R | R | R | R | I |
|  | 2_21 | *Candida albicans* | R | R | R | R | I |
|  | 2_23 | *Candida albicans* | S | S | I | S | S |
|  | 2_24 | *Candida tropicalis* | R | R | R | R | S |
|  | 2_25 | *Candida tropicalis* | R | R | R | R | S |
|  | 2_27 | *Candida albicans* | S | S | I | S | S |
|  | 3_3 | *Candida albicans* | S | I | S | I | S |
|  | 3_4 | *Candida albicans* | I | R | R | S | S |
|  | 3_6 | *Kluyveromyces marxianus* | S | S | R | S | I |
|  | 3_7 | *Kluyveromyces marxianus* | R | R | R | R | S |
|  | 3_8 | *Candida albicans* | S | S | R | S | S |
|  | 3_10 | *Candida albicans* | S | S | S | S | S |
|  | 3_11 | *Candida albicans* | S | S | I | S | S |
|  | 3_13 | *Candida albicans* | S | S | S | S | S |
|  | 3_16 | *Candida glabrata* | R | R | R | R | I |
|  | 3_17 | *Candida albicans* | S | S | I | S | S |
|  | 3_19 | *Candida albicans* | S | R | R | R | I |
|  | 3_20 | *Candida albicans* | R | R | R | S | I |
|  | 3_21 | *Candida albicans* | S | S | I | S | S |
|  | 3_22 | *Candida albicans* | S | R | R | S | S |
|  | 3_24 | *Candida albicans* | S | S | I | S | S |
|  | 3_25 | *Clavispora lusitaniae* | R | R | R | I | S |
|  | 3_26 | *Candida glabrata* | R | R | R | R | S |
|  | 4_5 | *Candida albicans* | S | S | I | S | S |
|  | 4_12 | *Candida albicans* | S | R | R | S | S |
|  | 4_21 | *Candida albicans* | S | S | S | S | S |
|  | 5_1 | *Candida tropicalis* | R | R | R | R | S |
|  | 5_2 | *Candida tropicalis* | R | R | R | R | S |
|  | 5_6 | *Pichia kudriavzevii* | I | R | R | R | I |
|  | 5_7 | *Candida albicans* | R | R | R | R | S |
|  | 5_10 | *Candida glabrata* | I | R | R | R | S |
|  | 5_13 | *Candida tropicalis* | R | R | R | R | I |
|  | 5_16 | *Candida glabrata* | R | R | R | R | I |
|  | 5_17 | *Candida tropicalis* | R | R | R | R | S |
|  | 5_18 | *Kodamaea ohmeri* | S | R | R | S | S |
|  | 5_19 | *Candida albicans* | R | R | R | S | S |
|  | 5_20 | *Candida albicans* | I | I | R | S | S |
|  | 6_2 | *Candida albicans* | S | R | R | S | S |
|  | 6_3 | *Candida glabrata* | R | R | R | R | S |
|  | 6_5 | *Candida albicans* | S | S | I | S | S |
|  | 6_11 | *Candida tropicalis* | R | R | R | R | S |
|  | 6_12 | *Candida albicans* | R | R | R | R | I |
|  | 6_13 | *Candida glabrata* | R | R | R | R | I |
|  | 6_14 | *Candida albicans* | R | R | I | I | S |
|  | 6_16 | *Candida albicans* | R | R | I | S | S |
|  | 6_18 | *Candida albicans* | I | R | R | S | I |
|  | 7_1 | *Candida albicans* | S | S | I | S | S |
|  | 7_3 | *Candida glabrata* | R | R | R | R | S |
|  | 7_4 | *Candida albicans* | S | S | R | S | I |
|  | 7_5 | *Candida tropicalis* | R | R | R | I | S |
|  | 7_6 | *Candida albicans* | R | R | R | R | I |
|  | 7_9 | *Candida tropicalis* | R | R | R | S | S |
|  | 7_10 | *Candida albicans* | R | I | R | S | S |
|  | 8_1 | *Candida albicans* | I | I | R | S | S |
|  | 8_2 | *Candida auris* | R | R | R | I | R |
|  | 8_3 | *Candida albicans* | I | S | R | S | S |
|  | 8_4 | *Candida albicans* | R | R | R | R | S |
|  | 8_7 | *Candida albicans* | R | R | R | R | S |
|  | 8_8 | *Candida tropicalis* | R | R | R | R | S |
|  | 8_9 | *Candida tropicalis* | R | R | R | R | S |
|  | 8_10 | *Candida tropicalis* | S | S | R | S | S |
|  | 8_12 | *Candida albicans* | R | R | R | R | S |
|  | 8_13 | *Candida albicans* | R | S | I | R | S |
|  | 8_14 | *Candida albicans* | S | S | I | S | S |
|  | 8_15 | *Candida parapsilosis* | S | I | I | S | S |
|  | 8_17 | *Candida albicans* | I | S | R | S | S |
|  | 8_18 | *Candida albicans* | I | S | R | S | S |
|  | 8_20 | *Candida parapsilosis* | S | S | R | S | I |
|  | 8_21 | *Candida albicans* | S | R | I | S | S |
|  | 8_23 | *Candida parapsilosis* | S | S | I | S | I |
|  | 9_2 | *Candida albicans* | S | S | I | S | S |
|  | 9_5 | *Pichia kudriavzevii* | R | R | R | R | R |
|  | 9_6 | *Candida albicans* | S | S | S | S | S |
|  | 9_8 | *Candida tropicalis* | I | R | R | R | S |
|  | 9_9 | *Candida glabrata* | R | R | R | R | I |
|  | 9_10 | *Candida tropicalis* | R | R | R | R | S |
|  | 9_13 | *Candida glabrata* | R | R | R | R | S |
|  | 10_1 | *Candida parapsilosis* | S | R | R | S | S |
|  | 10_2 | *Candida glabrata* | R | R | R | R | I |
|  | 10_3 | *Candida glabrata* | R | R | R | R | S |
|  | 10_4 | *Candida albicans* | R | I | R | I | I |
|  | 10_5 | *Candida tropicalis* | R | R | R | R | I |
|  | 10_6 | *Candida tropicalis* | R | R | R | R | I |
|  | 10_7 | *Candida glabrata* | R | R | R | R | S |
|  | 10_8 | *Candida albicans* | I | R | R | S | S |
|  | 10_9 | *Candida albicans* | R | R | R | I | I |
|  | 10_10 | *Candida glabrata* | R | R | R | R | R |
|  | 10_11 | *Candida albicans* | R | R | R | I | I |
|  | 10_12 | *Candida albicans* | R | I | R | S | S |
|  | 10_13 | *Candida albicans* | R | R | R | R | R |
|  | 10_14 | *Trichosporon asahii* | S | R | S | S | S |
|  | 10_15 | *Candida glabrata* | R | R | R | R | I |
|  | 10_16 | *Candida tropicalis* | R | R | R | R | I |
|  | 10_17 | *Candida albicans* | S | I | I | S | S |
|  | 10_18 | *Candida tropicalis* | R | R | R | R | I |
|  | 10_19 | *Candida tropicalis* | R | R | R | R | I |
|  | 10_22 | *Candida glabrata* | R | R | R | R | S |
|  | 10_23 | *Candida tropicalis* | R | R | R | R | R |
|  | 10_25 | *Candida tropicalis* | R | R | I | R | I |
|  | 10_26 | *Candida tropicalis* | R | R | R | R | I |
|  | 10_28 | *Candida albicans* | R | R | R | R | S |
|  | 10_30 | *Candida glabrata* | R | R | R | R | S |
|  | 10_31 | *Candida albicans* | S | I | I | S | S |
|  | 11_1 | *Candida albicans* | S | R | S | R | S |
|  | 11_2 | *Candida parapsilosis* | S | S | S | S | S |
|  | 11_3 | *Candida glabrata* | R | R | R | I | S |
|  | 11_6 | *Candida tropicalis* | R | R | R | R | I |
|  | 11_7 | *Candida albicans* | I | S | I | S | S |
|  | 11_8 | *Candida parapsilosis* | S | R | R | S | S |
|  | 11_9 | *Candida tropicalis* | R | R | R | R | S |
|  | 11_16 | *Candida tropicalis* | I | R | R | S | S |
|  | 11_17 | *Candida tropicalis* | R | R | R | R | S |
|  | 11_18 | *Candida tropicalis* | R | R | R | R | S |
|  | 11_19 | *Candida albicans* | R | I | R | S | S |
|  | 12_1 | *Candida glabrata* | R | R | R | R | S |
|  | 12_2 | *Candida albicans* | S | S | I | S | S |
|  | 12_3 | *Candida parapsilosis* | S | S | I | S | S |
|  | 12_4 | *Candida tropicalis* | R | R | R | R | S |
|  | 12_6 | *Candida albicans* | S | S | I | S | I |
|  | 12_7 | *Candida tropicalis* | R | R | R | R | S |
|  | 12_8 | *Candida tropicalis* | R | R | R | R | S |
|  | 13_2 | *Candida parapsilosis* | S | S | S | S | S |
|  | 13_4 | *Candida tropicalis* | R | R | I | S | S |
|  | 13_11 | *Candida glabrata* | R | R | R | R | S |
|  | 13_14 | *Candida albicans* | S | S | I | S | S |
|  | 13_15 | *Candida albicans* | S | S | I | S | S |
|  | 13_17 | *Candida albicans* | I | S | I | I | I |
|  | 13_18 | *Candida albicans* | S | R | I | S | S |
|  | 13_19 | *Candida tropicalis* | S | R | I | S | S |
|  | 13_22 | *Candida albicans* | S | S | I | S | S |
|  | 13_23 | *Candida tropicalis* | R | R | R | S | S |
|  | 13_24 | *Candida tropicalis* | R | R | I | R | S |
|  | 13_26 | *Candida parapsilosis* | R | R | R | R | S |
|  | 13_27 | *Candida tropicalis* | R | R | R | R | S |
|  | 13_28 | *Candida albicans* | S | S | S | S | S |
|  | 13_29 | *Candida tropicalis* | S | S | I | S | S |
|  | 13_30 | *Candida parapsilosis* | R | R | R | R | S |
|  | 13_32 | *Candida albicans* | S | S | I | S | S |
|  | 13_36 | *Lodderomyces sp.* | R | R | I | S | S |
|  | 13_37 | *Candida parapsilosis* | S | S | I | R | I |
|  | 13_39 | *Candida albicans* | S | R | R | R | S |

**Table S3** Percentage of *in vitro* antifungal susceptibility testing of five antifungal agents (*viz.*, clotrimazole, fluconazole, itraconazole, ketoconazole, nystatin) against 157 yeasts isolated during the study.

| **Susceptibility** | **Antifungal Agents** | | | | |
| --- | --- | --- | --- | --- | --- |
| **Clotrimazole** | **Fluconazole** | **Itraconazole** | **Ketoconazole** | **Nystatin** |
| **Intermediate** | 8.91 | 7.00 | 25.47 | 7.00 | 21.65 |
| **Resistant** | 52.86 | 63.05 | 66.87 | 43.94 | 3.18 |
| **Susceptible** | 38.21 | 29.93 | 7.64 | 48.40 | 75.15 |

**Table S4** Comparison of present and previous studies on diversity of yeast in clinical samples around the world

| **Reference** | **Meletiadis et al. (2017)** | **Lyon et al. (2010)** | **Basu et al. (2003)** | **Kaur et al. (2016)** | **Present study (2019)** |
| --- | --- | --- | --- | --- | --- |
| **Identification Methods** | **AFLP and ITS Region Sequencing** | **Traditional**  **Microbiological Methods** | **Traditional**  **Microbiological Methods** | **Traditional**  **Microbiological Methods** | **28S rRNA gene, MALDI-TOF MS and Hi-Crome** |
| Species observed along with number of isolates | *C. albicans* (n= 584) | *C. albicans* (n= 2563) | *C. albicans* (n=39) | *C. albicans* (n=33) | *C. albicans* (n=75) |
| *C. tropicalis* (n= 180) | *C. tropicalis* (n= 180) | *C. tropicalis* (n=21) | *C. tropicalis* (n=37) | *C. tropicalis* (n= 50) |
| *C. parapsilosis* (n= 122) | *C. parapsilosis* (n= 1032) | *C. parapsilosis* (n=9) | *C. parapsilosis* (n=6) | *C. parapsilosis* (n= 14) |
| *C. glabrata* (n= 86) | *C. glabrata* (n= 1449) | *C. glabrata* (n=1) | *C. glabrata* (n=9) | *C. glabrata* (n= 22) |
| *I. orientalis*  (n=30) | *I. orientalis* (n=109) | *I. orientalis* (n=6) | *I. orientalis* (n=3) | *Issatchenkia orientalis* (n=2) |
| *-* | - | *C. guilliermondii*)(n=3) | *-* |  |
| *-* | *-* | *C. kefyr* (n=6) | *C. kefyr* (n=2) | *-* |
| *Candida* spp. (n= 97) | *-* | **-** | *-* |  |
| *-* | *-* | **-** | *-* | *C. africana* (n=1) |
| *-* | *Cl. lusitaniae* (n=76) | **-** | *-* | *Clavispora lusitaniae* (n=4) |
| *-* |  | **-** | *-* | *Cyberlindnera fabianii* (n=2) |
| *-* | *-* | **-** | *-* | *Trichosporon asahii* (n=1) |
| *-* | *-* | **-** | *-* | *Kluyveromyces marxianus* (n=3) |
| *-* | *-* | **-** | *-* | *Lodderomyces* sp. (n=1) |
|  |  |  |  | *Kodamaea ohmeri* (n=1) |
| **Total Strains** | **1099** | **5821** | **85** | **90** | **176** |
|  | | | | | |

**Fig. S1.** Representative spectra of *T. asahii* (10_14)*, Cy. fabianii* (1_27)*, Ko. ohmeri* (6_4)*, K. marxianus* (3_8)*.*

**Fig. S2.** Representative images on chromogenic medium for identification of *Candida* species. a) Light Green colored colonies of *C.* *albicans*. b) Cream colored colonies of *C.* *glabrata*. c) Purple fuzzy colored colonies of *I. orientalis*. d) Bluish green colored colonies of *C.* *tropicalis*.

***
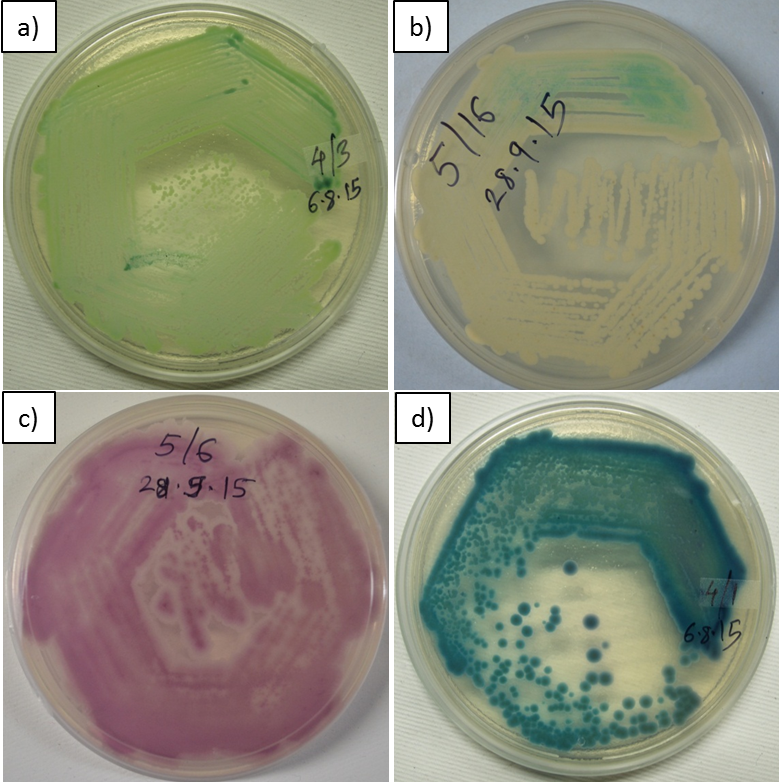
***

**Fig. S3.** Representative figure of Antifungal susceptibility pattern of *C. albicans* (3_13) and *C. tropicalis* (5_1).


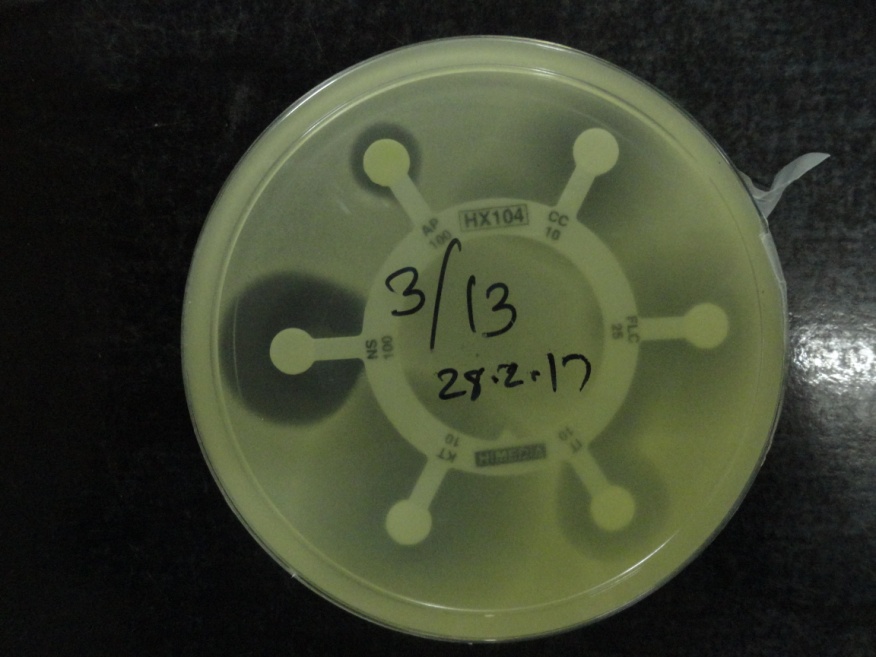

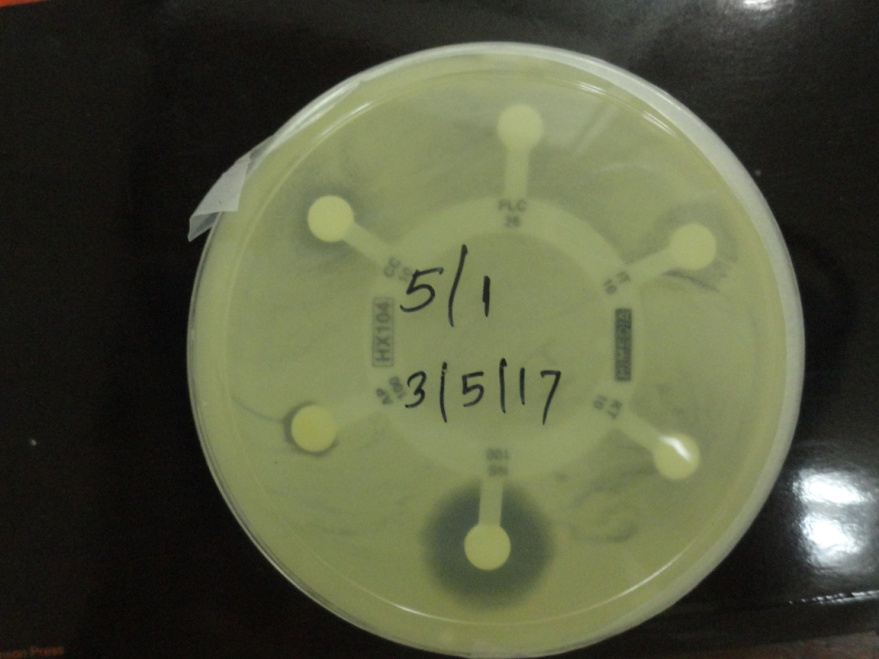


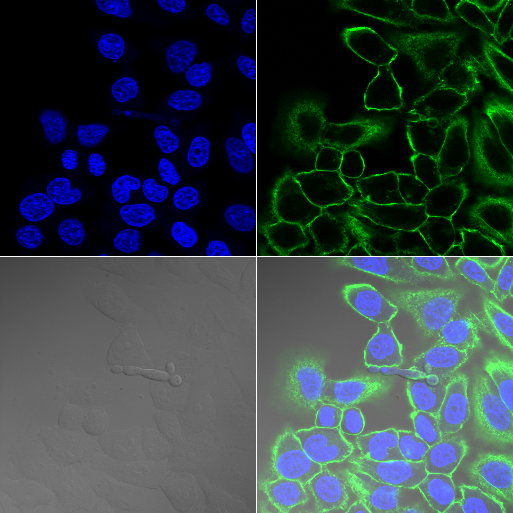
**Figure S4.** Confocal images of invasion of yeasts in HeLa cells. The pseudo-hyphae of *Candida tropicalis* (strain 10_19) invaded HeLa cells.


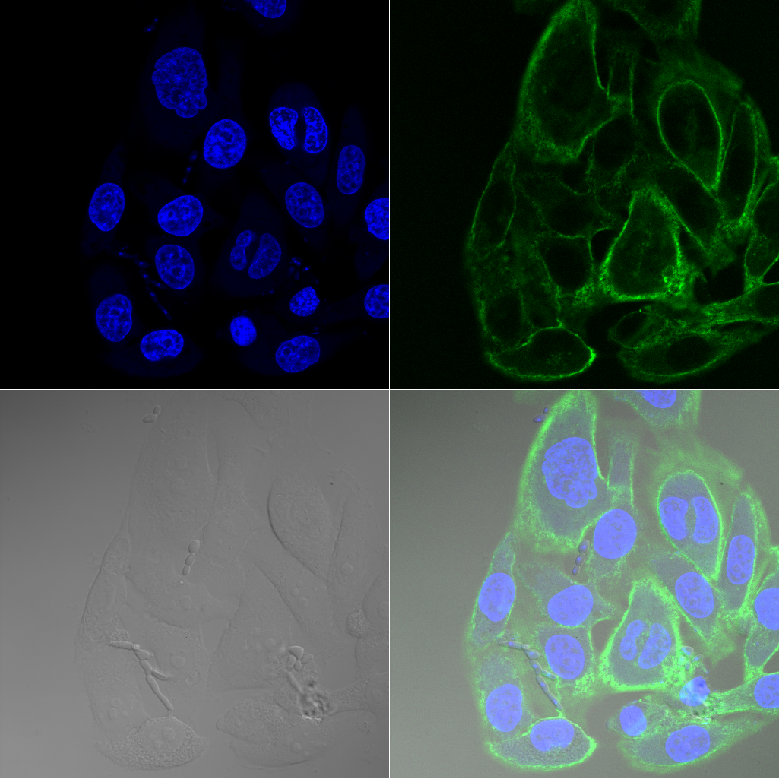
**Figure S5.** Confocal images of invasion of yeasts in HeLa cells. The yeast form of *Candida parapsilosis* (strain 8_20) invaded HeLa cells
